# Supplementary material for: Versatile frameworks constructed from divalent metals and 1,2,3,4-butanetetracarboxylate anion: syntheses, crystal structures, luminescence and magnetic properties
Source: Royal Society of Chemistry journal article supplement (doi:10.1039/b716476a), 2008-01-01
Supplement: b716476a.pdf [file b716476a.pdf]

## Electronic Supplementary Information

**Table S1.** Selected bond distances (Å) and angles (°) for **1**.

|                                |            |                                |           |
|--------------------------------|------------|--------------------------------|-----------|
| Cu(1)-O(4) <sup>i</sup>        | 1.986(3)   | Cu(1)-O(3W)                    | 1.992(3)  |
| Cu(1)-O(1)                     | 1.997(2)   | Cu(1)-O(5W)                    | 1.998(3)  |
| Cu(1)-O(4W)                    | 2.427(3)   |                                |           |
| O(4) <sup>i</sup> -Cu(1)-O(3W) | 89.73(11)  | O(4) <sup>i</sup> -Cu(1)-O(1)  | 163.43(8) |
| O(3W)-Cu(1)-O(1)               | 90.66(10)  | O(4) <sup>i</sup> -Cu(1)-O(5W) | 89.81(11) |
| O(3W)-Cu(1)-O(5W)              | 178.49(10) | O(1)-Cu(1)-O(5W)               | 90.19(10) |
| O(4) <sup>i</sup> -Cu(1)-O(4W) | 102.71(9)  | O(3W)-Cu(1)-O(4W)              | 89.43(11) |
| O(1)-Cu(1)-O(4W)               | 93.86(10)  | O(5W)-Cu(1)-O(4W)              | 89.27(11) |

Symmetry codes for **1**: <sup>i</sup>x+1/2, -y+1/2, z-1/2

**Table S2.** Selected bond distances (Å) and angles (°) for **2**.

|                                             |           |                                |            |
|---------------------------------------------|-----------|--------------------------------|------------|
| Ni(1)-O(5) <sup>i</sup>                     | 2.054(2)  | Ni(1)-O(3W)                    | 2.069(3)   |
| Ni(1)-O(2)                                  | 2.076(3)  | Ni(1)-O(1W)                    | 2.077(3)   |
| Ni(1)-O(5W)                                 | 2.082(2)  | Ni(1)-O(2W)                    | 2.166(3)   |
| Ni(2)-O(6) <sup>i</sup>                     | 2.075(2)  | Ni(2)-O(1)                     | 2.085(3)   |
| Ni(2)-O(8) <sup>ii</sup>                    | 2.098(2)  | Ni(2)-O(4) <sup>iii</sup>      | 2.111(2)   |
| Ni(2)-O(4W)                                 | 2.127(3)  | Ni(2)-O(5W)                    | 2.129(2)   |
| O(5) <sup>i</sup> -Ni(1)-O(2)               | 98.72(11) | O(5) <sup>i</sup> -Ni(1)-O(1W) | 174.77(12) |
| O(2)-Ni(1)-O(1W)                            | 85.43(11) | O(5) <sup>i</sup> -Ni(1)-O(3W) | 89.43(11)  |
| O(2)-Ni(1)-O(3W)                            | 89.39(11) | O(1W)-Ni(1)-O(3W)              | 93.81(13)  |
| O(5) <sup>i</sup> -Ni(1)-O(5W)              | 88.02(10) | O(2)-Ni(1)-O(5W)               | 95.64(10)  |
| O(1W)-Ni(1)-O(5W)                           | 88.41(12) | O(3W)-Ni(1)-O(5W)              | 174.65(12) |
| O(5) <sup>i</sup> -Ni(1)-O(2W)              | 87.38(13) | O(2)-Ni(1)-O(2W)               | 172.62(13) |
| O(1W)-Ni(1)-O(2W)                           | 88.72(13) | O(3W)-Ni(1)-O(2W)              | 86.51(13)  |
| O(5W)-Ni(1)-O(2W)                           | 88.68(12) | O(6) <sup>i</sup> -Ni(2)-O(1)  | 92.15(10)  |
| O(6) <sup>i</sup> -Ni(2)-O(8) <sup>ii</sup> | 91.45(10) | O(1)-Ni(2)-O(8) <sup>ii</sup>  | 172.77(10) |

|                                               |            |                                 |            |
|-----------------------------------------------|------------|---------------------------------|------------|
| O(6) <sup>i</sup> -Ni(2)-O(4) <sup>iii</sup>  | 176.75(10) | O(1)-Ni(2)-O(4) <sup>iii</sup>  | 85.80(10)  |
| O(8) <sup>ii</sup> -Ni(2)-O(4) <sup>iii</sup> | 90.32(10)  | O(6) <sup>i</sup> -Ni(2)-O(4W)  | 90.40(12)  |
| O(1)-Ni(2)-O(4W)                              | 88.77(11)  | O(8) <sup>ii</sup> -Ni(2)-O(4W) | 84.93(11)  |
| O(4) <sup>iii</sup> -Ni(2)-O(4W)              | 87.04(12)  | O(6) <sup>i</sup> -Ni(2)-O(5W)  | 92.42(10)  |
| O(1)-Ni(2)-O(5W)                              | 96.86(10)  | O(8) <sup>ii</sup> -Ni(2)-O(5W) | 89.25(10)  |
| O(4) <sup>iii</sup> -Ni(2)-O(5W)              | 90.33(9)   | O(4W)-Ni(2)-O(5W)               | 173.60(12) |

Symmetry codes for **2**: <sup>i</sup>x, y, z+1; <sup>ii</sup>-x+3/4, y-1/4, z+5/4; <sup>iii</sup>-x+3/4, y-1/4, z+1/4

**Table S3.** Selected bond distances (Å) and angles (°) for **3**.

|                                                  |            |                                                |            |
|--------------------------------------------------|------------|------------------------------------------------|------------|
| Zn(1)-O(4)                                       | 1.979(3)   | Zn(1)-O(1) <sup>ii</sup>                       | 2.152(4)   |
| Zn(1)-O(2) <sup>ii</sup>                         | 2.223(4)   | Zn(2)-O(1W) <sup>iv</sup>                      | 1.970(5)   |
| Zn(2)-O(2W')                                     | 2.032(9)   | Zn(2)-O(3)                                     | 2.061(3)   |
| Zn(2)-O(1W')                                     | 2.185(11)  | Zn(2)-O(2W)                                    | 2.275(17)  |
| O(4)-Zn(1)-O(4) <sup>i</sup>                     | 100.2(2)   | O(4) <sup>i</sup> -Zn(1)-O(1) <sup>iii</sup>   | 91.02(12)  |
| O(4) <sup>i</sup> -Zn(1)-O(1) <sup>ii</sup>      | 113.32(14) | O(1) <sup>ii</sup> -Zn(1)-O(1) <sup>iii</sup>  | 142.38(17) |
| O(4)-Zn(1)-O(2) <sup>ii</sup>                    | 149.51(13) | O(4) <sup>i</sup> -Zn(1)-O(2) <sup>ii</sup>    | 96.09(16)  |
| O(1) <sup>ii</sup> -Zn(1)-O(2) <sup>ii</sup>     | 58.76(13)  | O(1) <sup>iii</sup> -Zn(1)-O(2) <sup>ii</sup>  | 91.86(14)  |
| O(2) <sup>ii</sup> -Zn(1)-O(2) <sup>iii</sup>    | 82.1(2)    | O(1W) <sup>iv</sup> -Zn(2)-O(1W)               | 127.1(5)   |
| O(1W) <sup>iv</sup> -Zn(2)-O(2W')                | 134.1(3)   | O(1W)-Zn(2)-O(2W')                             | 98.7(4)    |
| O(2W') <sup>iv</sup> -Zn(2)-O(2W')               | 35.4(5)    | O(1W) <sup>iv</sup> -Zn(2)-O(3) <sup>iv</sup>  | 92.1(2)    |
| O(1W)-Zn(2)-O(3) <sup>iv</sup>                   | 86.0(2)    | O(2W') <sup>iv</sup> -Zn(2)-O(3) <sup>iv</sup> | 93.4(3)    |
| O(2W')-Zn(2)-O(3) <sup>iv</sup>                  | 90.7(3)    | O(1W) <sup>iv</sup> -Zn(2)-O(3)                | 86.0(2)    |
| O(1W)-Zn(2)-O(3)                                 | 92.1(2)    | O(2W') <sup>iv</sup> -Zn(2)-O(3)               | 90.7(3)    |
| O(2W')-Zn(2)-O(3)                                | 93.4(3)    | O(3) <sup>iv</sup> -Zn(2)-O(3)                 | 175.7(2)   |
| O(1W) <sup>iv</sup> -Zn(2)-O(1W') <sup>iv</sup>  | 29.0(3)    | O(1W)-Zn(2)-O(1W') <sup>iv</sup>               | 98.1(4)    |
| O(2W') <sup>iv</sup> -Zn(2)-O(1W') <sup>iv</sup> | 127.7(4)   | O(2W')-Zn(2)-O(1W') <sup>iv</sup>              | 163.0(4)   |
| O(3) <sup>iv</sup> -Zn(2)-O(1W') <sup>iv</sup>   | 88.7(3)    | O(3)-Zn(2)-O(1W') <sup>iv</sup>                | 87.7(3)    |
| O(1W') <sup>iv</sup> -Zn(2)-O(1W')               | 69.2(6)    | O(1W) <sup>iv</sup> -Zn(2)-O(2W)               | 179.0(5)   |
| O(1W)-Zn(2)-O(2W)                                | 53.9(5)    | O(2W') <sup>iv</sup> -Zn(2)-O(2W)              | 80.2(5)    |
| O(2W')-Zn(2)-O(2W)                               | 44.8(5)    | O(3) <sup>iv</sup> -Zn(2)-O(2W)                | 87.7(5)    |

|                                 |          |                                                |          |
|---------------------------------|----------|------------------------------------------------|----------|
| O(3)-Zn(2)-O(2W)                | 94.3(5)  | O(1W') <sup>iv</sup> -Zn(2)-O(2W)              | 152.0(5) |
| O(1W')-Zn(2)-O(2W)              | 82.9(5)  | O(1W) <sup>iv</sup> -Zn(2)-O(2W) <sup>iv</sup> | 53.9(5)  |
| O(1W)-Zn(2)-O(2W) <sup>iv</sup> | 179.0(5) | O(2W')-Zn(2)-O(2W) <sup>iv</sup>               | 80.2(5)  |
| O(3)-Zn(2)-O(2W) <sup>iv</sup>  | 87.7(5)  | O(2W)-Zn(2)-O(2W) <sup>iv</sup>                | 125.1(8) |

Symmetry codes for **3**: <sup>i</sup>-x+1/2, -y, z; <sup>ii</sup>-x+1/2, y, z-1/2; <sup>iii</sup>x, -y, z-1/2; <sup>iv</sup>-x+1/2, -y+1, z

**Table S4.** Selected bond distances (Å) and angles (°) for **4**.

|                                            |            |                               |            |
|--------------------------------------------|------------|-------------------------------|------------|
| Mn(1)-O(1)                                 | 2.110(3)   | Mn(1)-O(1W)                   | 2.141(3)   |
| Mn(1)-O(3) <sup>i</sup>                    | 2.156(3)   | Mn(1)-N(2)                    | 2.247(3)   |
| Mn(1)-N(1)                                 | 2.279(3)   | Mn(1)-O(4) <sup>i</sup>       | 2.458(3)   |
| O(1)-Mn(1)-O(1W)                           | 88.83(11)  | O(1)-Mn(1)-O(3) <sup>i</sup>  | 104.52(10) |
| O(1W)-Mn(1)-O(3) <sup>i</sup>              | 88.56(12)  | O(1)-Mn(1)-N(2)               | 89.75(10)  |
| O(1W)-Mn(1)-N(2)                           | 131.99(12) | O(3) <sup>i</sup> -Mn(1)-N(2) | 137.75(11) |
| O(1)-Mn(1)-N(1)                            | 149.80(11) | O(1W)-Mn(1)-N(1)              | 86.60(11)  |
| O(3) <sup>i</sup> -Mn(1)-N(1)              | 105.19(10) | N(2)-Mn(1)-N(1)               | 71.69(10)  |
| O(1)-Mn(1)-O(4) <sup>i</sup>               | 93.93(10)  | O(1W)-Mn(1)-O(4) <sup>i</sup> | 143.89(11) |
| O(3) <sup>i</sup> -Mn(1)-O(4) <sup>i</sup> | 55.89(9)   | N(2)-Mn(1)-O(4) <sup>i</sup>  | 84.07(10)  |
| N(1)-Mn(1)-O(4) <sup>i</sup>               | 107.14(10) |                               |            |

Symmetry code for **4**: <sup>i</sup>x+1, y, z

**Table S5.** Selected bond distances (Å) and angles (°) for **5**.

|                               |            |                               |           |
|-------------------------------|------------|-------------------------------|-----------|
| Mn(1)-O(2)                    | 2.102(2)   | Mn(1)-O(1W)                   | 2.127(2)  |
| Mn(1)-O(3) <sup>i</sup>       | 2.135(2)   | Mn(1)-N(2)                    | 2.241(3)  |
| Mn(1)-N(1)                    | 2.288(3)   |                               |           |
| O(2)-Mn(1)-O(1W)              | 88.68(10)  | O(2)-Mn(1)-O(3) <sup>i</sup>  | 103.00(9) |
| O(1W)-Mn(1)-O(3) <sup>i</sup> | 94.36(10)  | O(2)-Mn(1)-N(2)               | 93.11(8)  |
| O(1W)-Mn(1)-N(2)              | 130.07(10) | O(3) <sup>i</sup> -Mn(1)-N(2) | 133.23(9) |
| O(2)-Mn(1)-N(1)               | 155.07(9)  | O(1W)-Mn(1)-N(1)              | 84.91(10) |
| O(3) <sup>i</sup> -Mn(1)-N(1) | 101.49(10) | N(2)-Mn(1)-N(1)               | 73.15(9)  |

Symmetry code for **5**: <sup>i</sup>x+1, y, z

**Table S6.** Selected bond distances (Å) and angles (°) for **6**.

|                                             |            |                                |            |
|---------------------------------------------|------------|--------------------------------|------------|
| Zn(1)-O(1)                                  | 1.974(3)   | Zn(1)-O(3) <sup>i</sup>        | 1.986(3)   |
| Zn(1)-N(1) <sup>ii</sup>                    | 2.003(3)   | Zn(1)-N(3)                     | 2.018(3)   |
| O(1)-Zn(1)-O(3) <sup>i</sup>                | 115.88(13) | O(1)-Zn(1)-N(1) <sup>ii</sup>  | 119.87(13) |
| O(3) <sup>i</sup> -Zn(1)-N(1) <sup>ii</sup> | 107.35(13) | O(1)-Zn(1)-N(3)                | 102.62(13) |
| O(3) <sup>i</sup> -Zn(1)-N(3)               | 100.06(14) | N(1) <sup>ii</sup> -Zn(1)-N(3) | 108.87(13) |

Symmetry codes for **6**: <sup>i</sup>-x, y-1/2, -z+3/2; <sup>ii</sup>-x+1, y+1/2, -z+3/2

**Table S7.** Selected bond distances (Å) and angles (°) for **7**.

|                                             |            |                               |            |
|---------------------------------------------|------------|-------------------------------|------------|
| Zn(1)-O(1)                                  | 1.962(2)   | Zn(1)-O(3) <sup>i</sup>       | 1.970(2)   |
| Zn(1)-N(1)                                  | 1.991(3)   | Zn(1)-O(4) <sup>ii</sup>      | 1.999(2)   |
| O(1)-Zn(1)-O(3) <sup>i</sup>                | 125.75(9)  | O(1)-Zn(1)-N(1)               | 115.45(10) |
| O(3) <sup>i</sup> -Zn(1)-N(1)               | 111.64(10) | O(1)-Zn(1)-O(4) <sup>ii</sup> | 100.16(10) |
| O(3) <sup>i</sup> -Zn(1)-O(4) <sup>ii</sup> | 90.67(8)   | N(1)-Zn(1)-O(4) <sup>ii</sup> | 106.58(10) |

Symmetry codes for **7**: <sup>i</sup>-x, y+1/2, -z+3/2; <sup>ii</sup> x, y+1, z

**Table S8.** Selected bond distances (Å) and angles (°) for **8**.

|                                 |            |                                              |            |
|---------------------------------|------------|----------------------------------------------|------------|
| Zn(1)-O(3) <sup>i</sup>         | 1.949(3)   | Zn(1)-O(1)                                   | 1.999(3)   |
| Zn(1)-N(1) <sup>ii</sup>        | 2.017(3)   | Zn(1)-N(1') <sup>ii</sup>                    | 2.028(14)  |
| Zn(1)-N(3)                      | 2.028(3)   |                                              |            |
| O(3) <sup>i</sup> -Zn(1)-O(1)   | 105.09(11) | O(3) <sup>i</sup> -Zn(1)-N(1) <sup>ii</sup>  | 121.8(3)   |
| O(1)-Zn(1)-N(1) <sup>ii</sup>   | 113.4(4)   | O(3) <sup>i</sup> -Zn(1)-N(1') <sup>ii</sup> | 113.0(3)   |
| O(1)-Zn(1)-N(1') <sup>ii</sup>  | 117.0(4)   | O(3) <sup>i</sup> -Zn(1)-N(3)                | 110.08(14) |
| O(1)-Zn(1)-N(3)                 | 102.75(13) | N(1) <sup>ii</sup> -Zn(1)-N(3)               | 102.1(3)   |
| N(1') <sup>ii</sup> -Zn(1)-N(3) | 108.4(4)   |                                              |            |

Symmetry code for **8**: <sup>i</sup>-x+2, -y, -z+2; <sup>ii</sup> -x+3/2, y-1/2, -z+1/2

**Table S9.** Selected bond distances (Å) and angles (°) for **9**.

|            |          |                         |          |
|------------|----------|-------------------------|----------|
| Co(1)-O(2) | 1.963(3) | Co(1)-O(4) <sup>i</sup> | 2.021(3) |
|------------|----------|-------------------------|----------|

|                                             |            |                                |            |
|---------------------------------------------|------------|--------------------------------|------------|
| Co(1)-N(1) <sup>ii</sup>                    | 2.034(3)   | Co(1)-N(3)                     | 2.042(3)   |
| O(2)-Co(1)-O(4) <sup>i</sup>                | 103.38(12) | O(2)-Co(1)-N(1) <sup>ii</sup>  | 121.35(13) |
| O(4) <sup>i</sup> -Co(1)-N(1) <sup>ii</sup> | 115.77(12) | O(2)-Co(1)-N(3)                | 110.00(13) |
| O(4) <sup>i</sup> -Co(1)-N(3)               | 100.83(12) | N(1) <sup>ii</sup> -Co(1)-N(3) | 103.66(13) |

Symmetry code for **9**: <sup>i</sup>-x+2, -y+1, -z+1; <sup>ii</sup>-x+3/2, y+1/2, -z-1/2

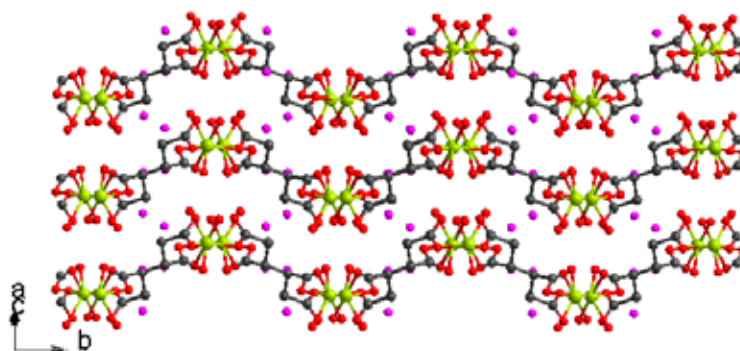

**Fig. S1** View of the 3D supramolecular network of **1** (pink dots represent free water molecules).

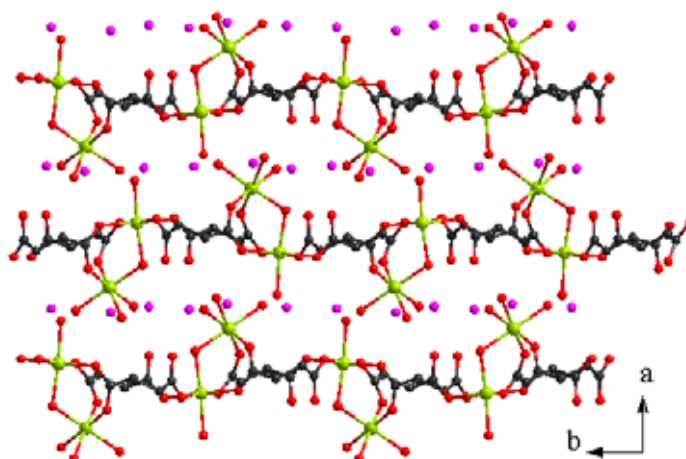

**Fig. S2** View of the 3D supramolecular network of **2** (pink dots represent free water molecules).

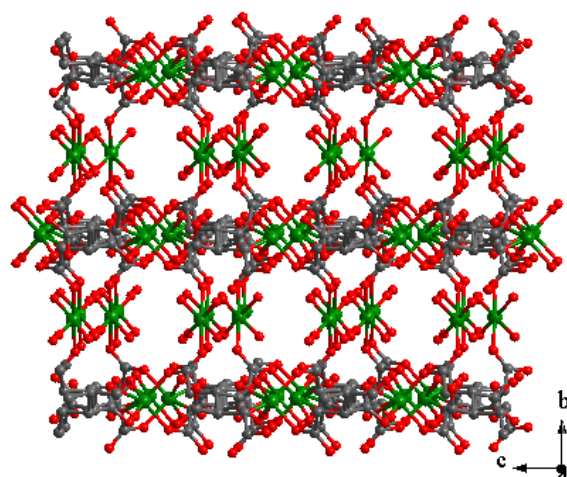

**Fig. S3** View of the 3D network of **3**.

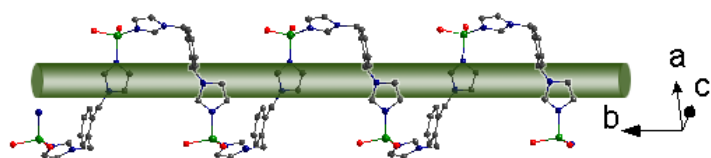

**Fig. S4** The helical chain of the '*trans*' shaped obib ligands in **6**.

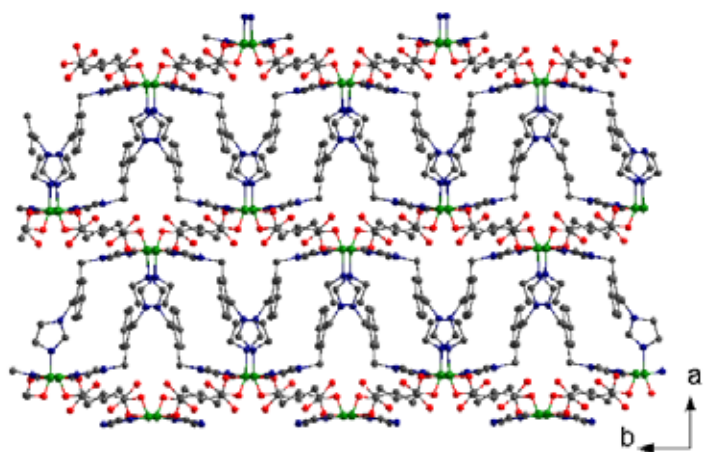

**Fig. S5** View of the 3D network of **6**.

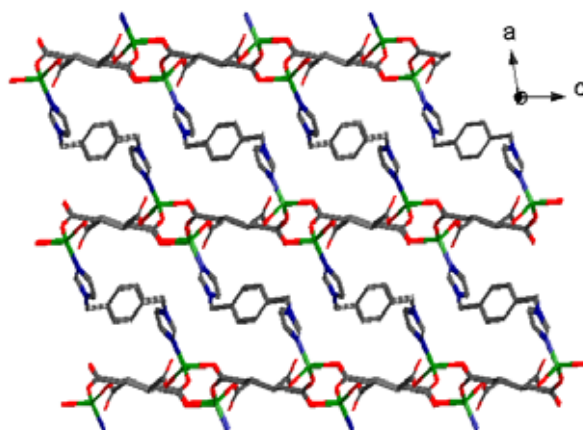

**Fig. S6** View of the 3D network of **7**.

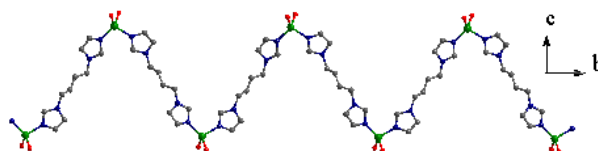

**Fig. S7** The infinite zigzag chain of the bbi ligands in **8**.

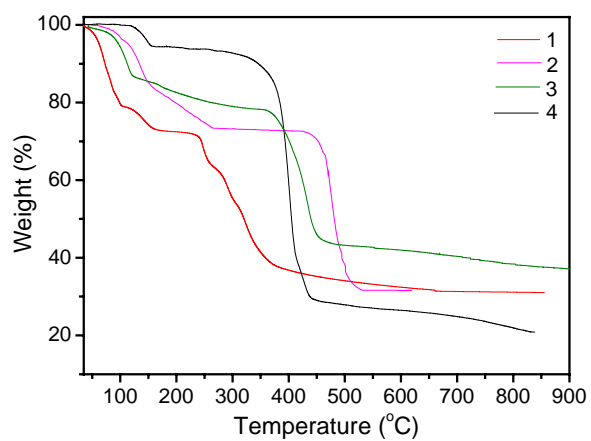

**Fig. S8** TGA curves of **1-4**.

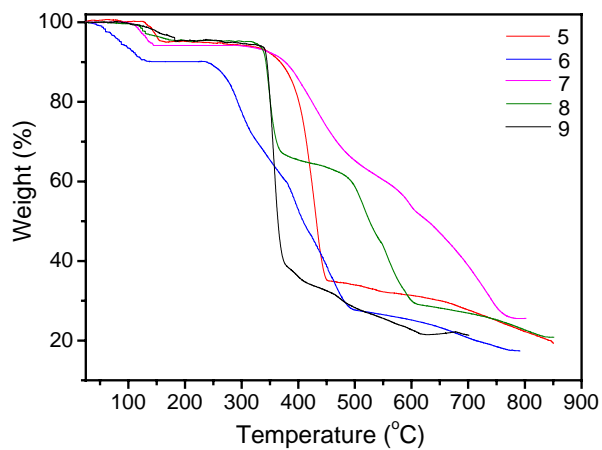

**Fig. S9** TGA curves of **5-9**.

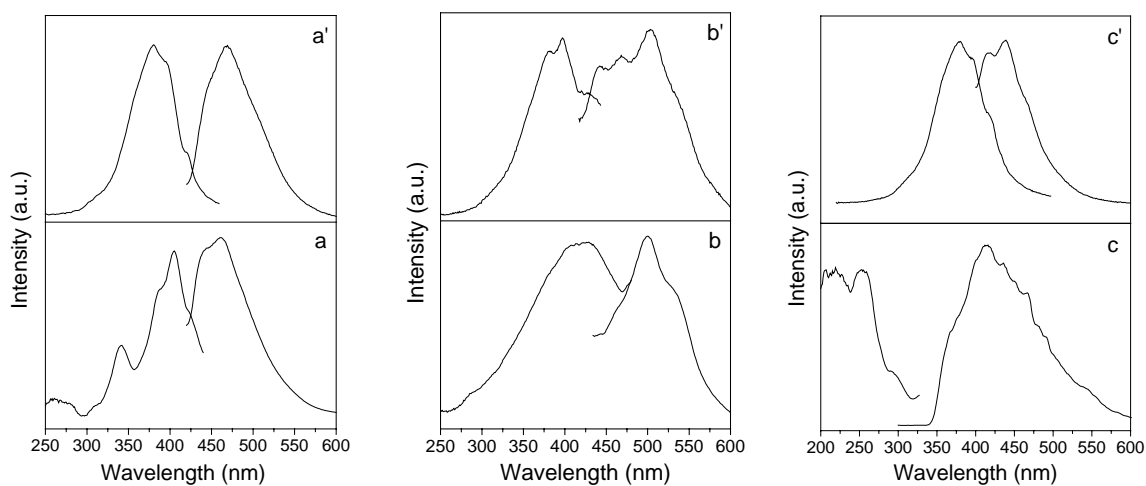

**Fig. S10** Solid-state photoluminescent spectra of **6** (a), **7** (b) and **8** (c) and free ligands obib (a'), pbib (b') and bbi (c') at room temperature.

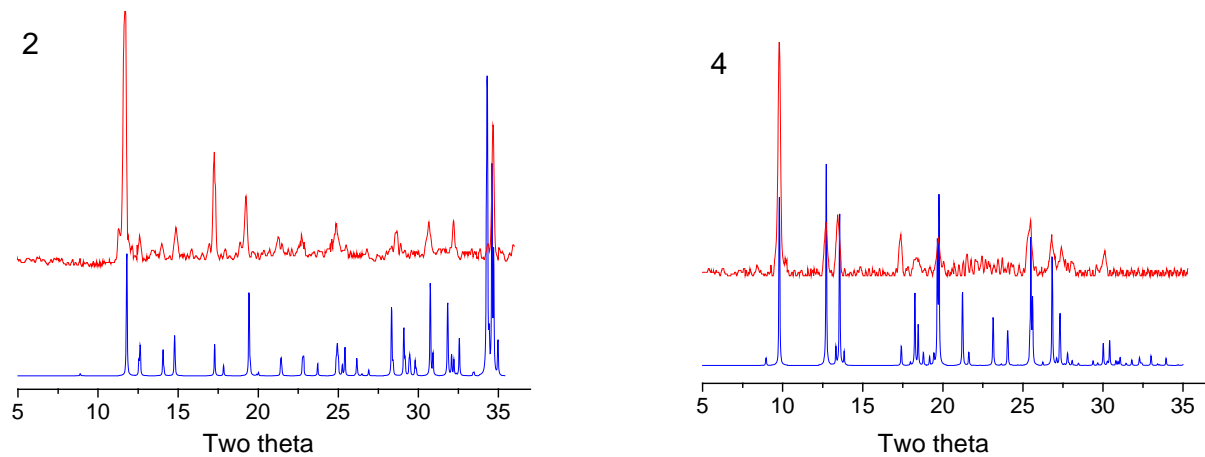



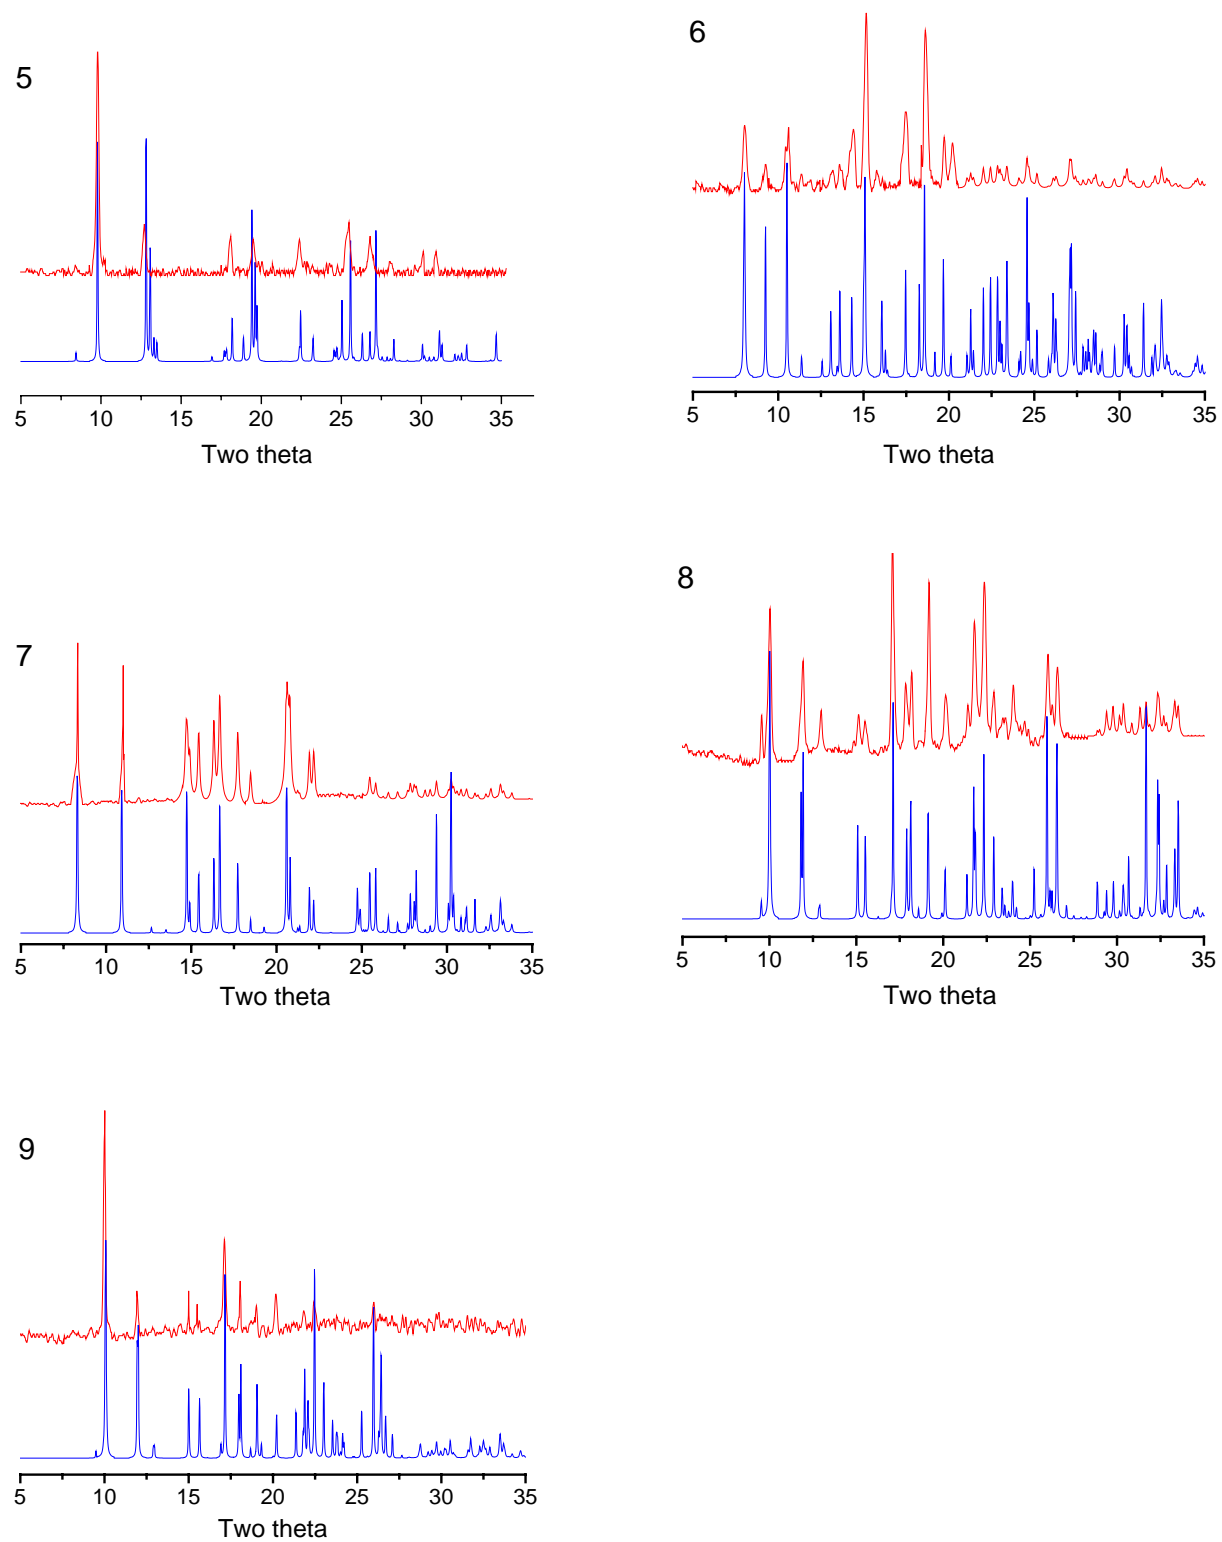

**Fig. S11.** The simulated (blue) and experimental (red) XRPD patterns for the compounds.
